# Supplementary material for: Environmental Sustainability By Recycling of PET Plastic Bottles And Reusing Them In Textile Industry: A Game-Theoretic Approach
Source: Research Square preprint supplement (doi:10.21203/rs.3.rs-664190/v1), 2021-07-06
Supplement: Supplementary file 1 [file d243d39656918334da912914.docx]

**Graphical Abstract:**
